# Supplementary material
Source: PubMed Central journal article supplement (PMC6506900)
Supplement: jamasurg-154-716-s001.pdf [file jamasurg-154-716-s001.pdf]

## Supplementary Online Content

Tanabe C, Reed MJ, Pham TN, Penn K, Bentov I, Kaplan SJ. Association of brain atrophy and masseter sarcopenia with 1-year mortality in elderly trauma patients. *JAMA Surg*. Published online May 8, 2019. doi:10.1001/jamasurg.2019.0988

**eFigure.** Study flow diagram.

This supplementary material has been provided by the authors to give readers additional information about their work.

eFigure. Study flow diagram.

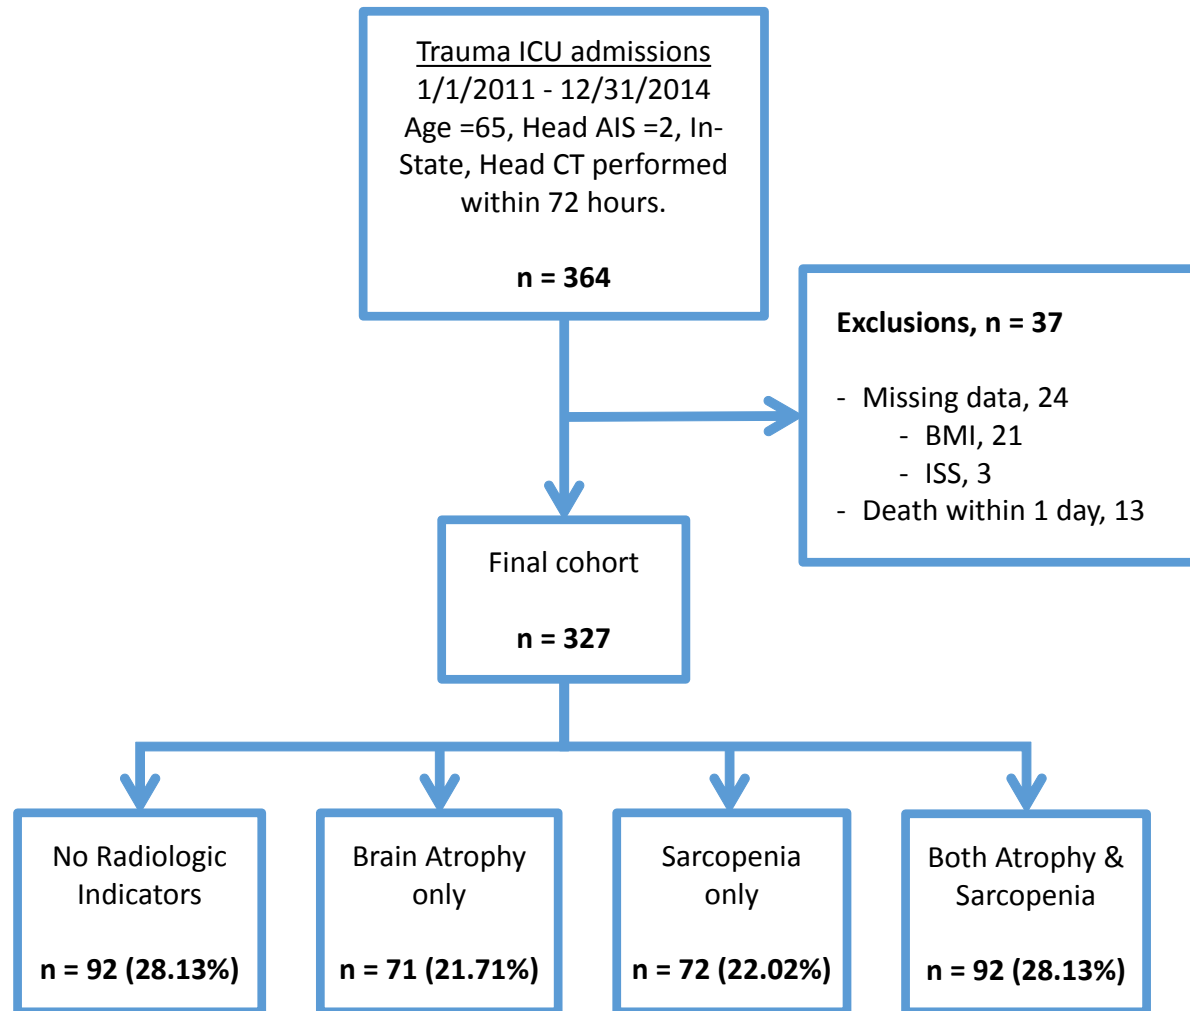

AIS, abbreviated injury score. CT, computed tomography. Patients with any missing data values were excluded; the 24 patients excluded for missing data were did not have BMI (or height and weight), and/or complete AIS scoring in the trauma registry.
